# Supplementary material
Source: PubMed Central journal article supplement (PMC3296884)
Supplement: NIHMS340274-supplement-Supp_Table_S1.pdf [file NIHMS340274-supplement-Supp_Table_S1.pdf]

**TABLE 1. Summary of results for all specimens tested for CDK4 expression.**

Summary of results for all specimens tested for CDK4 expression, including number and percentage of CDK4 positive specimens. A specimen was considered CDK4 positive when it presented clear nuclear staining by immunohistochemistry (observed by CDK4 and Hoechst colocalization). Some specimens were discarded due to the fact that the microarray core was missing or it was negative for nuclear staining with Hoechst, which was the case for one core from non-pathogenic SEER array cores and five cores from adenocarcinoma SEER array cores.

| Non-pathogenic samples        | SEER array   | UTIP healthy series          | PAC 481 array | Global        |
|-------------------------------|--------------|------------------------------|---------------|---------------|
| CDK4 positive                 | 7/15 (47 %)  | 4/7 (57 %)                   | 3/3 (100 %)   | 14/25 (56 %)  |
| Discarded                     | 1/15 (7 %)   | 0/7 (0 %)                    | 0/3 (0 %)     | 1/25 (4 %)    |
| Total                         | 15           | 7                            | 3             | 25            |
| Adenocarcinoma samples        | SEER array   | Clinic adenocarcinoma series | PAC481 array  | Global        |
| CDK4 positive                 | 74/96 (77 %) | 4/14 (29 %)                  | 6/20 (30 %)   | 84/130 (65 %) |
| Discarded                     | 5/96 (4 %)   | 0/14 (0 %)                   | 0/20 (0 %)    | 5/130 (4 %)   |
| Total                         | 96           | 14                           | 20            | 130           |
| Neuroendocrine tumour samples | SEER array   |                              |               |               |
| CDK4 positive                 | 4/5 (80 %)   |                              |               |               |
| Discarded                     | 0/5 (0 %)    |                              |               |               |
| Total                         | 5            |                              |               |               |
